# Supplementary material
Source: Springer Nature journal article supplement (https://www.springermedizin.de/resource/supplementary/12887_2011_647_MOESM4_ESM.pdf/9475722)
Supplement: MOESM4 [file 9475722]

October

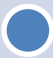

## Orientation

*30 minutes*

Introduction to handwashing -- why, how, and when, with hands on demonstrations (e.g., experiment with spray on "germs")

December

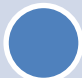

## Review

*10 minutes*

Review of when to wash hands -- distributed/discussed handwashing/sanitizing schedule in each classroom

February

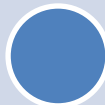

## Review

*10 minutes*

Review of how to wash hands -- focused on timing by singing a song (e.g., "Happy Birthday")

March

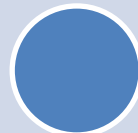

## Review

*10 minutes*

Review of why we wash hands -- shared a clip of identifiable characters explaining germs, etc. (e.g., Elmo in younger classrooms)

May

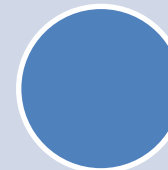

## Orientation

*30 minutes*

Repeat of introduction to handwashing for students in the control group (No data collected beyond this point)

October



## Orientation

*30 minutes*

Introduction to handwashing -- why, how, and when, with hands on demonstrations (e.g., experiment with spray on "germs")

December



## Review

*10 minutes*

Review of when to wash hands -- distributed/discussed handwashing/sanitizing schedule in each classroom

February



## Review

*10 minutes*

Review of how to wash hands -- focused on timing by singing a song (e.g., "Happy Birthday")

March

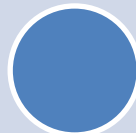

## Review

*10 minutes*

Review of why we wash hands -- shared a clip of identifiable characters explaining germs, etc. (e.g., Elmo in younger classrooms)

May

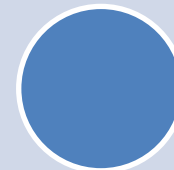

## Orientation

*30 minutes*

Repeat of introduction to handwashing for students in the control group (No data collected beyond this point)
